# Supplementary material for: Divergent convective outflow in large-eddy simulations
Source: Copernicus journal article supplement (doi:10.5194/acp-23-6065-2023), 2023-06-02
Supplement: Supplementary file 1 [file acp-23-6065-2023-supplement.zip]

Archive with 4 entries (4 files):
- Working_divergent_outflows_of_convection(7).pdf
- acp-23-6065-2023-supplement-title-page.pdf
- readme.txt
- 7km_fullset_supplement2_egusphere-2022-1261.csv
