# Supplementary material for: Divergent convective outflow in large-eddy simulations
Source: Copernicus journal article supplement (doi:10.5194/acp-23-6065-2023), 2023-06-02
Supplement: Supplementary file 1 [file acp-23-6065-2023-supplement.zip › 7km_fullset_supplement2_egusphere-2022-1261.csv]

Name	Organisation_type	Experiment_set	Time_interval	Precipitation_flux_(W/m2)	Divergent_outflow_7-14_km
Rect_1000m	Supercell	Resolution	90	893.2886991	2.26E-05
Rect_1000m	Supercell	Resolution	30	4655.669667	6.75E-05
Rect_500m	Supercell	Resolution	90	1074.723208	2.49E-05
Rect_500m	Supercell	Resolution	30	5565.968496	7.45E-05
Cubic_200m	Supercell	Resolution	90	1128.087874	2.43E-05
Cubic_200m	Supercell	Resolution	30	5370.177946	6.71E-05
Cubic_100m	Supercell	Resolution	90	1213.320584	2.41E-05
Cubic_100m	Supercell	Resolution	30	5747.868507	6.36E-05
Cubic_100m	Multicell	Resolution	90	380.808358	6.33E-06
Cubic_100m	Multicell	Resolution	30	1403.4848	2.50E-05
Cubic_200m	Multicell	Resolution	90	356.5524006	6.64E-06
Cubic_200m	Multicell	Resolution	30	1533.293945	2.73E-05
Rect_500m	Multicell	Resolution	90	325.7150181	6.39E-06
Rect_500m	Multicell	Resolution	30	1298.86455	2.20E-05
Rect_1000m	Multicell	Resolution	90	296.257614	6.54E-06
Rect_1000m	Multicell	Resolution	30	1456.998986	2.85E-05
Rect_1000m	Infinite squall line	Resolution	75	2327.112004	1.60E-05
Rect_1000m	Infinite squall line	Resolution	45	4738.554919	3.77E-05
Rect_500m	Infinite squall line	Resolution	75	2451.823493	1.84E-05
Rect_500m	Infinite squall line	Resolution	45	4533.477371	4.12E-05
Cubic_200m	Infinite squall line	Resolution	75	1877.342445	8.14E-06
Cubic_200m	Infinite squall line	Resolution	45	3918.421126	4.19E-05
Cubic_100m	Infinite squall line	Resolution	75	2389.232961	1.35E-05
Cubic_100m	Infinite squall line	Resolution	45	3564.630131	3.08E-05
Lve_0.6	Infinite squall line	Physics	75	645.1814179	2.03E-06
Lve_0.6	Infinite squall line	Physics	45	1073.98035	5.00E-06
Lve_0.8	Infinite squall line	Physics	75	1577.73981	7.58E-06
Lve_0.8	Infinite squall line	Physics	45	3085.359876	3.35E-05
Lve_0.9	Infinite squall line	Physics	75	1962.134981	1.65E-05
Lve_0.9	Infinite squall line	Physics	45	4334.973587	4.27E-05
Lve_1.1	Infinite squall line	Physics	75	2683	1.34E-05
Lve_1.1	Infinite squall line	Physics	45	4436	3.90E-05
Lve_1.2	Infinite squall line	Physics	75	3015.730985	1.81E-05
Lve_1.2	Infinite squall line	Physics	45	5362.495478	4.52E-05
Control	Infinite squall line	Ensemble	75	1788.818822	1.11E-05
Control	Infinite squall line	Ensemble	45	4170	4.03E-05
ENS-01	Infinite squall line	Ensemble	75	2013	1.07E-05
ENS-01	Infinite squall line	Ensemble	45	4115	4.11E-05
ENS-02	Infinite squall line	Ensemble	75	2056	1.25E-05
ENS-02	Infinite squall line	Ensemble	45	4233	4.44E-05
ENS-03	Infinite squall line	Ensemble	75	2209	1.57E-05
ENS-03	Infinite squall line	Ensemble	45	4278	3.93E-05
ENS-04	Infinite squall line	Ensemble	75	2064	1.54E-05
ENS-04	Infinite squall line	Ensemble	45	4458	4.06E-05
ENS-05	Infinite squall line	Ensemble	75	2138	1.33E-05
ENS-05	Infinite squall line	Ensemble	45	4055	4.05E-05
ENS-06	Infinite squall line	Ensemble	75	1962	1.20E-05
ENS-06	Infinite squall line	Ensemble	45	4200	3.96E-05
ENS-07	Infinite squall line	Ensemble	75	1974	1.22E-05
ENS-07	Infinite squall line	Ensemble	45	3788	3.89E-05
ENS-08	Infinite squall line	Ensemble	75	1974	1.18E-05
ENS-08	Infinite squall line	Ensemble	45	4044	4.14E-05
ENS-09	Infinite squall line	Ensemble	75	2017	1.20E-05
ENS-09	Infinite squall line	Ensemble	45	4218	4.13E-05
Vadv_0.00	Infinite squall line	Physics	75	1588	8.56E-06
Vadv_0.00	Infinite squall line	Physics	45	2035	2.01E-05
Vadv_0.50	Infinite squall line	Physics	75	1902	9.67E-06
Vadv_0.50	Infinite squall line	Physics	45	2787	2.69E-05
Vadv_1.50	Infinite squall line	Physics	75	2161	1.62E-05
Vadv_1.50	Infinite squall line	Physics	45	4383	2.98E-05
Modified_thpert	Infinite squall line	Physics	75	2031	1.47E-05
Modified_thpert	Infinite squall line	Physics	45	4672	4.00E-05
Modified_max_thpert	Infinite squall line	Physics	75	1392	7.20E-06
Modified_max_thpert	Infinite squall line	Physics	45	2763	2.58E-05
Lve_0.6	Supercell	Physics	90	108.6427714	5.72E-08
Lve_0.6	Supercell	Physics	30	251.0792525	-1.35E-06
Lve_0.8	Supercell	Physics	90	575.1824553	8.67E-06
Lve_0.8	Supercell	Physics	30	3033.558843	4.29E-05
Lve_0.9	Supercell	Physics	90	900.3915146	1.80E-05
Lve_0.9	Supercell	Physics	30	4744.185132	6.07E-05
Lve_1.1	Supercell	Physics	90	1409.532591	2.84E-05
Lve_1.1	Supercell	Physics	30	6416.304298	6.80E-05
Lve_1.2	Supercell	Physics	90	1526.247928	2.99E-05
Lve_1.2	Supercell	Physics	30	6950.349571	6.40E-05
ENS-02	Supercell	Physics	90	1231.691679	2.54E-05
ENS-02	Supercell	Physics	30	5931.935434	6.33E-05
ENS-03	Supercell	Physics	90	1188.751301	2.48E-05
ENS-03	Supercell	Physics	30	5569.266696	6.37E-05
ENS-04	Supercell	Physics	90	1171.12501	2.46E-05
ENS-04	Supercell	Physics	30	5522.826458	6.48E-05
ENS-05	Supercell	Physics	90	1235.672295	2.53E-05
ENS-05	Supercell	Physics	30	5876.47473	6.41E-05
ENS-06	Supercell	Physics	90	1233.648101	2.48E-05
ENS-06	Supercell	Physics	30	5652.030622	6.59E-05
ENS-07	Supercell	Physics	90	1227.16999	2.52E-05
ENS-07	Supercell	Physics	30	6042.840692	6.77E-05
ENS-08	Supercell	Physics	90	1200.654362	2.49E-05
ENS-08	Supercell	Physics	30	5695.800001	6.56E-05
ENS-09	Supercell	Physics	90	1161.759473	2.47E-05
ENS-09	Supercell	Physics	30	5457.059135	6.85E-05
Vadv_0.00	Supercell	Physics	90	803.038431	1.67E-05
Vadv_0.00	Supercell	Physics	30	3954.456055	6.59E-05
Vadv_0.50	Supercell	Physics	90	916.6333896	1.91E-05
Vadv_0.50	Supercell	Physics	30	3525.693696	4.59E-05
Vadv_1.50	Supercell	Physics	90	964.6778695	2.03E-05
Vadv_1.50	Supercell	Physics	30	4872.825849	6.87E-05
Modified_thpert	Supercell	Physics	90	1798.476456	2.68E-05
Modified_thpert	Supercell	Physics	30	6307.999876	7.11E-05
Modified_max_thpert	Supercell	Physics	90	1257.883492	2.40E-05
Modified_max_thpert	Supercell	Physics	30	6010.218941	7.37E-05
Control	Supercell	Ensemble	90	1430	2.48E-05
Control	Supercell	Ensemble	30	5531.726837	6.46E-05
ENS-01	Supercell	Ensemble	90	1175.471954	2.46E-05
ENS-01	Supercell	Ensemble	30	5644.662777	6.53E-05
Lve_0.6	Multicell	Physics	90	91.97090532	7.44E-07
Lve_0.6	Multicell	Physics	30	147.363435	8.31E-07
Lve_0.8	Multicell	Physics	90	239.1305216	3.64E-06
Lve_0.8	Multicell	Physics	30	731	1.21E-05
Lve_0.9	Multicell	Physics	90	329.2762984	5.24E-06
Lve_0.9	Multicell	Physics	30	1087.637758	1.87E-05
Lve_1.1	Multicell	Physics	90	407.1697151	7.85E-06
Lve_1.1	Multicell	Physics	30	1875.829973	3.60E-05
Lve_1.2	Multicell	Physics	90	428.0649551	8.82E-06
Lve_1.2	Multicell	Physics	30	2161.540094	3.89E-05
Control	Multicell	Ensemble	90	386.6263453	6.76E-06
Control	Multicell	Ensemble	30	1522.415783	2.64E-05
ENS-01	Multicell	Ensemble	90	384.062838	6.81E-06
ENS-01	Multicell	Ensemble	30	1397.011486	2.44E-05
ENS-02	Multicell	Ensemble	90	360.8244642	6.41E-06
ENS-02	Multicell	Ensemble	30	1527.765059	2.69E-05
ENS-03	Multicell	Ensemble	90	370	6.57E-06
ENS-03	Multicell	Ensemble	30	1481.915101	2.58E-05
ENS-04	Multicell	Ensemble	90	382.4063876	6.54E-06
ENS-04	Multicell	Ensemble	30	1471.745131	2.59E-05
ENS-05	Multicell	Ensemble	90	361.3139492	6.41E-06
ENS-05	Multicell	Ensemble	30	1504.886147	2.66E-05
ENS-06	Multicell	Ensemble	90	385.3353265	6.72E-06
ENS-06	Multicell	Ensemble	30	1606.008917	2.88E-05
ENS-07	Multicell	Ensemble	90	361.7409762	6.48E-06
ENS-07	Multicell	Ensemble	30	1470.317049	2.78E-05
ENS-08	Multicell	Ensemble	90	388.8394663	6.96E-06
ENS-08	Multicell	Ensemble	30	1572.083311	2.86E-05
ENS-09	Multicell	Ensemble	90	376.7184581	6.54E-06
ENS-09	Multicell	Ensemble	30	1496.414865	2.65E-05
Vadv_0.00	Multicell	Physics	90	344.3786309	5.98E-06
Vadv_0.00	Multicell	Physics	30	1492.608269	2.75E-05
Vadv_0.50	Multicell	Physics	90	460.9823435	7.69E-06
Vadv_0.50	Multicell	Physics	30	1692.593207	3.02E-05
Vadv_1.50	Multicell	Physics	90	333.3192029	5.74E-06
Vadv_1.50	Multicell	Physics	30	1436.766502	2.93E-05
Modified_thpert	Multicell	Physics	90	648.1187227	6.96E-06
Modified_thpert	Multicell	Physics	30	1738	1.16E-05
Modified_max_thpert	Multicell	Physics	90	417.4082403	6.63E-06
Modified_max_thpert	Multicell	Physics	30	1609.555052	2.82E-05
Control	Finite squall line center	Ensemble	75	1752.9021	2.32E-05
Control	Finite squall line center	Ensemble	45	4656.212948	5.08E-05
Control	Finite squall line end	Ensemble	75	330.133727	6.05E-06
Control	Finite squall line end	Ensemble	45	2808.282945	4.73E-05
Control	Finite squall line full	Ensemble	75	1062.286044	1.48E-05
Control	Finite squall line full	Ensemble	45	3733.448867	4.98E-05
ENS-01	Finite squall line center	Ensemble	75	1735.663173	2.35E-05
ENS-01	Finite squall line center	Ensemble	45	4491.678906	4.72E-05
ENS-01	Finite squall line end	Ensemble	75	334.5040707	6.18E-06
ENS-01	Finite squall line end	Ensemble	45	2903.50881	4.97E-05
ENS-01	Finite squall line full	Ensemble	75	1057.178533	1.48E-05
ENS-01	Finite squall line full	Ensemble	45	3641	4.81E-05
ENS-02	Finite squall line center	Ensemble	75	1673.815182	2.28E-05
ENS-02	Finite squall line center	Ensemble	45	4468	4.90E-05
ENS-02	Finite squall line end	Ensemble	75	319.6922511	5.91E-06
ENS-02	Finite squall line end	Ensemble	45	2817	4.63E-05
ENS-02	Finite squall line full	Ensemble	75	1015.079414	1.45E-05
ENS-02	Finite squall line full	Ensemble	45	3630	4.77E-05
ENS-03	Finite squall line center	Ensemble	75	1728.786021	2.29E-05
ENS-03	Finite squall line center	Ensemble	45	4331	4.92E-05
ENS-03	Finite squall line end	Ensemble	75	321.352128	5.81E-06
ENS-03	Finite squall line end	Ensemble	45	2820	4.44E-05
ENS-03	Finite squall line full	Ensemble	75	1042.834818	1.46E-05
ENS-03	Finite squall line full	Ensemble	45	3595	4.72E-05
ENS-04	Finite squall line center	Ensemble	75	1737.46296	2.34E-05
ENS-04	Finite squall line center	Ensemble	45	4437	4.86E-05
ENS-04	Finite squall line end	Ensemble	75	321.6646703	5.69E-06
ENS-04	Finite squall line end	Ensemble	45	2819	4.70E-05
ENS-04	Finite squall line full	Ensemble	75	1055.605086	1.49E-05
ENS-04	Finite squall line full	Ensemble	45	3629	4.91E-05
PENS-01	Finite squall line center	Ensemble	75	1346.975628	1.99E-05
PENS-01	Finite squall line center	Ensemble	45	3732	4.53E-05
PENS-01	Finite squall line end	Ensemble	75	170.9228519	3.55E-06
PENS-01	Finite squall line end	Ensemble	45	2142	3.47E-05
PENS-01	Finite squall line full	Ensemble	75	795.9505226	1.14E-05
PENS-01	Finite squall line full	Ensemble	45	2912	4.05E-05
PENS-02	Finite squall line center	Ensemble	75	1937.667922	2.52E-05
PENS-02	Finite squall line center	Ensemble	45	4614	4.78E-05
PENS-02	Finite squall line end	Ensemble	75	427.9381617	7.78E-06
PENS-02	Finite squall line end	Ensemble	45	3159	4.68E-05
PENS-02	Finite squall line full	Ensemble	75	1213.356389	1.69E-05
PENS-02	Finite squall line full	Ensemble	45	3869	4.82E-05
PENS-03	Finite squall line center	Ensemble	75	1747.917655	2.99E-05
PENS-03	Finite squall line center	Ensemble	45	6234	6.25E-05
PENS-03	Finite squall line end	Ensemble	75	380.1196145	8.22E-06
PENS-03	Finite squall line end	Ensemble	45	2847.892892	3.88E-05
PENS-03	Finite squall line full	Ensemble	75	1104.773743	1.80E-05
PENS-03	Finite squall line full	Ensemble	45	4444.371707	5.31E-05
PENS-04	Finite squall line center	Ensemble	75	1747.838979	2.38E-05
PENS-04	Finite squall line center	Ensemble	45	4622.776551	4.92E-05
PENS-04	Finite squall line end	Ensemble	75	273.3608341	6.31E-06
PENS-04	Finite squall line end	Ensemble	45	2792	4.52E-05
PENS-04	Finite squall line full	Ensemble	75	1045.743529	1.49E-05
PENS-04	Finite squall line full	Ensemble	45	3629.66659	4.66E-05
Extended domain	Supercell	Extended domain	90	1197.77011	2.38E-05
Extended domain	Supercell	Extended domain	30	5527.24145	6.32E-05
PENS-00	Finite squall line center	Extended domain	75	1361.282324	1.82E-05
PENS-00	Finite squall line center	Extended domain	45	3299.60801	3.37E-05
PENS-00	Finite squall line end	Extended domain	75	174.9469725	2.61E-06
PENS-00	Finite squall line end	Extended domain	45	2222.909608	3.01E-05
PENS-00	Finite squall line full	Extended domain	75	808.3389204	1.05E-05
PENS-00	Finite squall line full	Extended domain	45	2832.744841	3.30E-05
