# Supplementary material for: Divergent convective outflow in large-eddy simulations
Source: Copernicus journal article supplement (doi:10.5194/acp-23-6065-2023), 2023-06-02
Supplement: Supplementary file 1 [file acp-23-6065-2023-supplement.zip › acp-23-6065-2023-supplement-title-page.pdf]

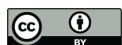

## *Supplement of*

# **Divergent convective outflow in large-eddy simulations**

**Edward Groot and Holger Tost**

*Correspondence to:* Edward Groot ([egroot@uni-mainz.de](mailto:egroot@uni-mainz.de))

- [acp-23-6065-2023-supplement-title-page.pdf](#)
- [7km\\_fullset\\_supplement2\\_egusphere-2022-1261.csv](#)
- [Working\\_divergent\\_outflows\\_of\\_convection\(7\).pdf](#)
- [readme.txt](#)

The copyright of individual parts of the supplement might differ from the article licence.
