# Supplementary material for: Divergent convective outflow in large-eddy simulations
Source: Copernicus journal article supplement (doi:10.5194/acp-23-6065-2023), 2023-06-02
Supplement: Supplementary file 1 [file acp-23-6065-2023-supplement.zip › readme.txt]

The table "7km_fullset_supplement2_egusphere-2022-1261.csv" contains values obtained for Figure 5 of EGUsphere-2022-1261 in its revision.
All precipitation and 7-14 km mean divergences over the horizontal integration mask of Figure 3 are available.

The experiment names contain the following abbreviations:
- Rect = rectangular grid (dz ≠ dy = dx, of x m or km grid spacing)
- Cubic = cubic grid (dx = dy = dz, of x m grid spacing)  
- Lve = proportionality of latent heating constant to its physical value (fraction)
- Vadv = proportionality of perturbation of vertical advection horizontal momentum (fraction)
- Modified_thmax_pert/modified_thpert = modifications of the initial potential temperature profile, by rescaling the warm bubble or cold pool perturbations, or linear combinations of those rescalings
- PENS = the wide ensemble band of the finite-length squall line (as opposed to the "narrow band", referred to as "ENS"). PENS-00 is at the same time the extended domain simulations and members PENS 1-4 and ENS 1-4 reflect the other 8 ensemble members of finite-length squall lines.


The column Experiment_set is explained in Figure 1. 
The column organisation_type are the ones used in Figure 6, and similar to the top row of Figure 1. However, the finite-length squall line is appearing as its full integration AND its end region AND its center region!
The time_interval column is explained in the main text: two separate time intervals have been analysed. 
